# Supplementary material for: Identification of key predictors of hospital mortality in critically ill patients with embolic stroke using machine learning
Source: PubMed Central journal article supplement (PMC9484010; doi:10.1042/bsr20220995), 2022-09-14
Supplement: BSR-2022-0995_supp.pdf [file BSR-2022-0995_supp.pdf]

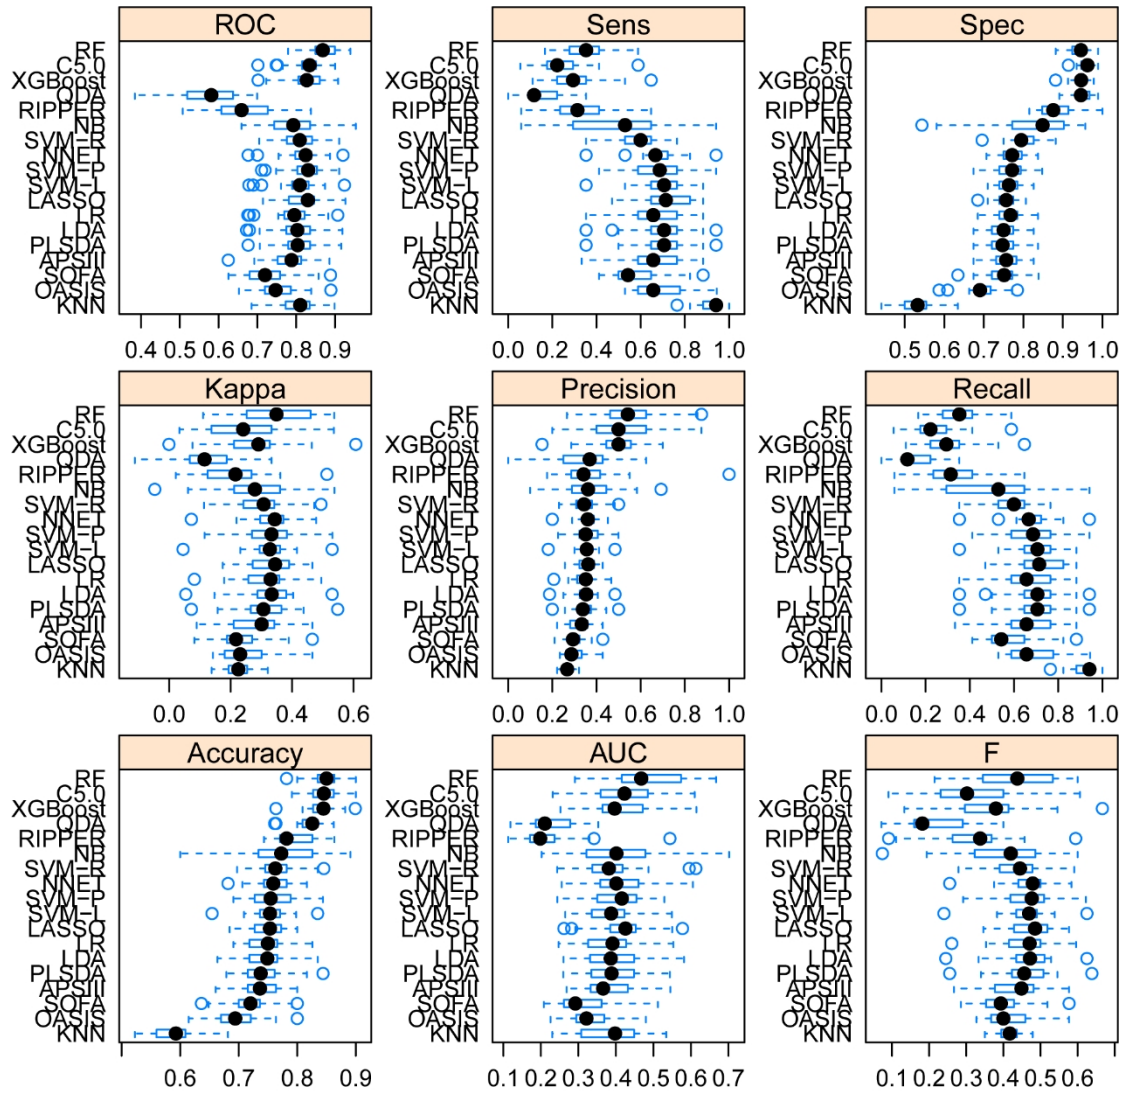

**Supplementary Figure 1. Comparison of AUROC among the models in the training cohort.**

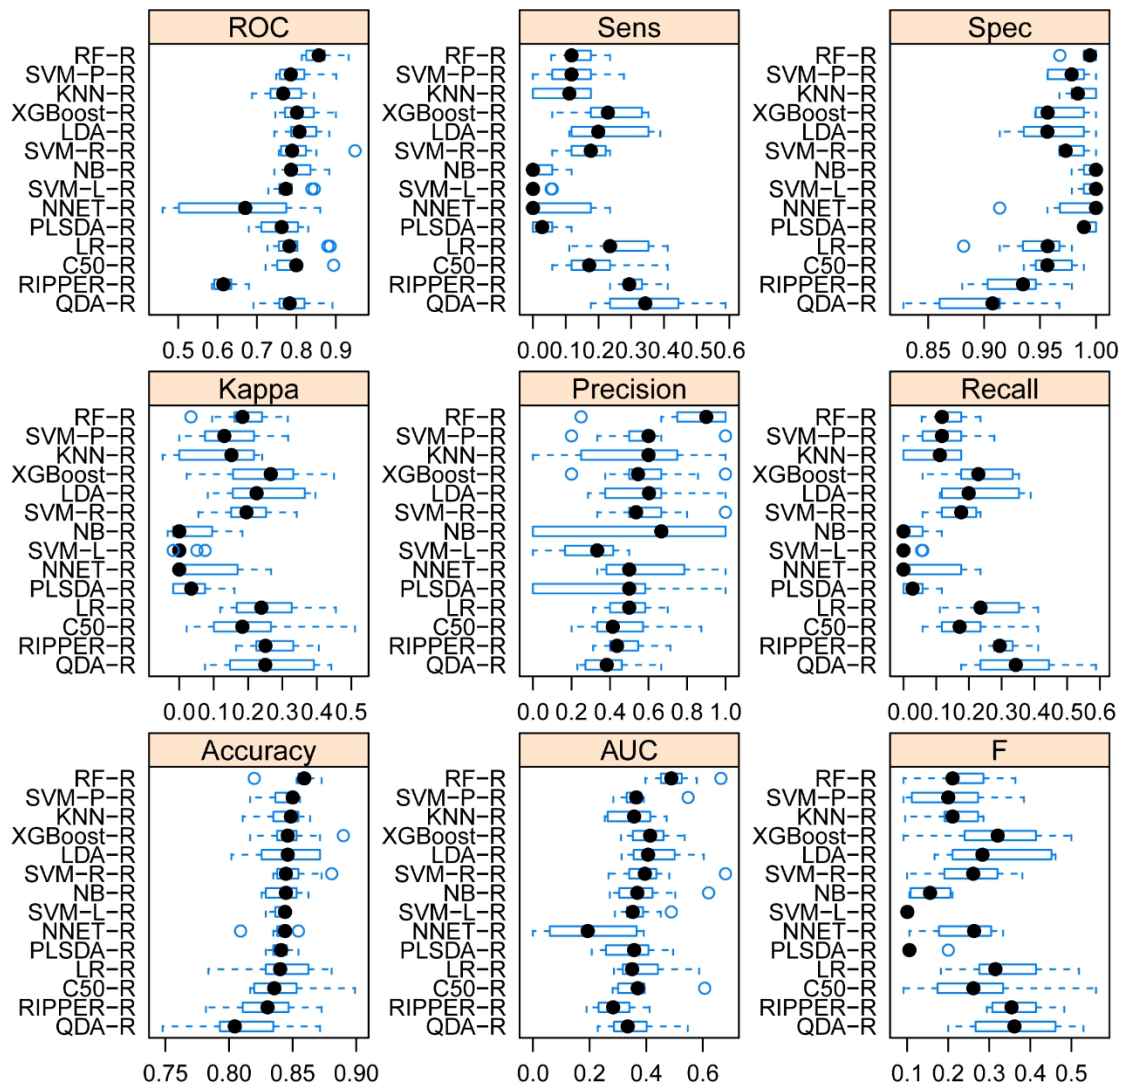

**Supplementary Material Figure 2. Comparison of AUROC among the 14 machine learning models for recursive feature selection in the training cohort.**

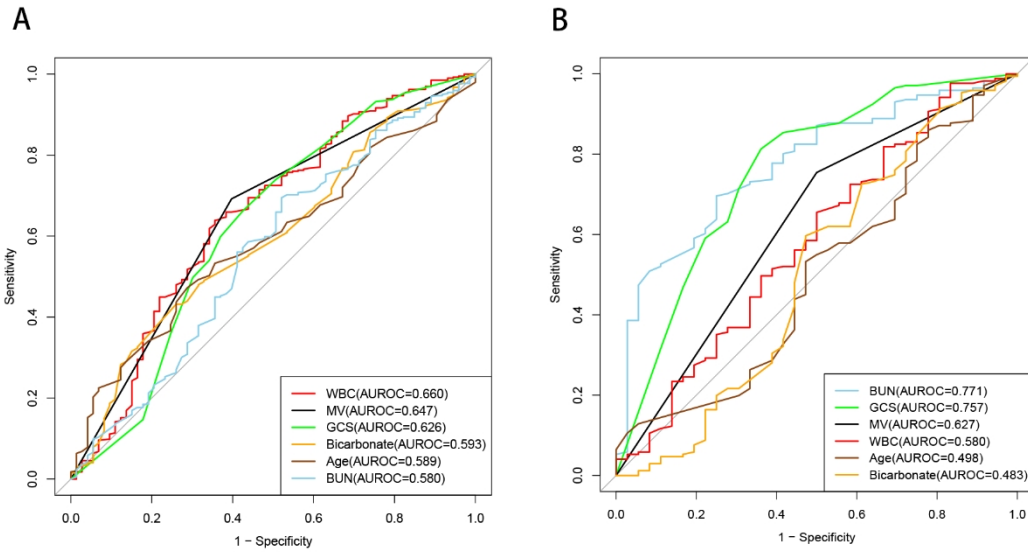

**Supplementary Material Figure 3. Comparison of predictive ability among the top six features.**

(A) AUROC in the internal validation cohort. (B) AUROC in the external validation cohort

**Supplementary Material Table 1. Search ICD codes or terms of embolic stroke in the MIMIC-IV and eICU-CRD databases**

| Database | Search codes or terms                                                                                                                                                                                                                                                                                            |
|----------|------------------------------------------------------------------------------------------------------------------------------------------------------------------------------------------------------------------------------------------------------------------------------------------------------------------|
| MIMIC-IV | ICD-9:<br>43411:<br>ICD-10:<br>I6310, I6311, I63111, I63112, I63113, I63119, I6312, I6313, I63131, I63132, I63133, I63139, I6319, I634, I6340, I6341, I63411, I63412, I63413, I63419, I6342, I63421, I63422, I63423, I63429, I6343, I63431, I63432, I63433, I63439, I6344, I63441, I63442, I63443, I63449, I6349 |
| eICU-CRD | ischemic stroke cardioembolic<br>ischemic stroke atheroembolic                                                                                                                                                                                                                                                   |

ICD, International Classification of Diseases; MIMIC, Medical Information Mart for Intensive Care; eICU-CRD, eICU Collaborative Research Database; ICD, International classification of diseases.

**Supplementary Material Table 2. Predictors extracted from MIMIC-IV and eICU-CRD databases**

| <b>Variable type</b>        | <b>Variable</b>                                                                                                                                                                                                    |
|-----------------------------|--------------------------------------------------------------------------------------------------------------------------------------------------------------------------------------------------------------------|
| Demographic characteristics | Age, Weight, Gender, Ethnicity                                                                                                                                                                                     |
| Vital signs                 | SBP, DBP, HR, RR, Temperature, SpO <sub>2</sub>                                                                                                                                                                    |
| Laboratory tests            | WBC, RBC, MCH, MCHC, RDW, Hematocrit, Hemoglobin, Platelets, Aniongap, Bicarbonate, BUN, Creatinine, Glucose, Chloride, Sodium, Potassium, Calcium                                                                 |
| Comorbidities               | COPD, CHD, CHF, Hypertension, Hyperlipidemia, AF, Endocarditis, Cardiomyopathy, Valve Disease, PVD, Liver Disease, Renal Disease, Diabetes, Malignancy, Anemia, Thrombocytopenia, Coagulopathy, Delirium, Dementia |
| Drugs and treatments        | Aspirin, Alteplase, Warfarin, Albumin, Epinephrine, Vasopressin, RRT, MV                                                                                                                                           |
| Scoring systems             | GCS, APSIII, OASIS, SOFA                                                                                                                                                                                           |

MIMIC, Medical Information Mart for Intensive Care; eICU-CRD, eICU Collaborative Research Database; SBP, systolic blood pressure; DBP, diastolic blood pressure; HR, heart rate; RR, respiratory rate; SpO<sub>2</sub>, peripheral oxygen saturation; WBC, white blood cell count; RBC, red blood cell count; MCH, mean corpuscular hemoglobin; MCHC, mean corpuscular hemoglobin contentration; RDW, red cell volume distribution width; BUN, blood urea nitrogen; COPD, chronic obstructive pulmonary disease; CHD, coronary heart disease; CHF, congestive heart failure; AF, atrial fibrillation; PVD, peripheral vascular disease; RRT, renal replacement therapy; MV, mechanical ventilation; GCS, Glasgow Coma Scale; APSIII, Acute Physiology and Chronic Health Evaluation III; OASIS, Oxford acute severity of illness score; SOFA, Sequential Organ Failure Assessment.

**Supplementary Material Table 3. Variable comparisons between the RF-COM model and the scoring systems**

| <b>APSIH</b>                                       | <b>SOFA</b>                        | <b>OASIS</b>     | <b>RF-COM</b> |
|----------------------------------------------------|------------------------------------|------------------|---------------|
| GCS                                                | GCS                                | GCS              | GCS           |
| WBC                                                | MV                                 | MV               | WBC           |
| BUN                                                | Platelets                          | Age              | BUN           |
| Respiratory rate                                   | Bilirubin                          | Heart rate       | Bicarbonate   |
| PaO <sub>2</sub> / P <sub>A-a</sub> O <sub>2</sub> | MAP                                | MAP              | Age           |
| Hematocrit                                         | Dopamine                           | Respiratory rate | MV            |
| Heart rate                                         | Dobutamine                         | Temperature      |               |
| Creatinine                                         | Adrenaline                         | Urine output     |               |
| Urine output                                       | Norepinephrine                     | Pre-ICU LOS      |               |
| MAP                                                | Creatinine                         | Elective surgery |               |
| Sodium                                             | Urine output                       |                  |               |
| Albumin                                            | PaO <sub>2</sub> /FiO <sub>2</sub> |                  |               |
| Bilirubin                                          |                                    |                  |               |
| Glucose                                            |                                    |                  |               |
| pH                                                 |                                    |                  |               |
| Temperature                                        |                                    |                  |               |

RF-COM model, random forest compact model; APSIII, Acute Physiology Score III; SOFA, Sequential Organ Failure Assessment; OASIS, Oxford Acute Severity of Illness Score; MAP, mean arterial pressure; PaO<sub>2</sub>, Partial pressure of arterial oxygen; P<sub>A-a</sub>O<sub>2</sub>, alveolar-arterial PO<sub>2</sub> difference; WBC, white blood cell count; BUN, blood urea nitrogen; GCS, Glasgow Coma Scale; LOS, length of stay; MV, mechanical ventilation.
